# Supplementary material for: First report of the ectomycorrhizal fungal community associated with two herbaceous plants in Inner Mongolia, China
Source: PeerJ. 2023 Jul 14;11:e15626. doi: 10.7717/peerj.15626 (PMC10351511; doi:10.7717/peerj.15626)
Supplement: Supplemental Information 1 — MAT, mean annual temperature. MAP, mean annual precipitation. AN, soil available nitrogen. AP, soil available phosphorus. AK, soil available potassium. OM, soil total organic matter. TN, soil total nitrogen. TP, soil total phosphorus. TK, soil total potassium. TC, soil total carbon. [file peerj-11-15626-s001.xlsx]

## Sheet: Sheet1
Supplementary Table 1. Sampling sites, plant species and environmental variables in present study.
Site	plant	Number of root samples	Number of soil samples	Altitude (m)	Latitude (°)	Longitude (°)	MAT (℃)	MAP (mm)	pH	AN(mg.kg-1)	AP (mg.kg-1)	AK(mg.kg-1)	OM(mg.kg-1)	TN(g.kg-1)	TP(g.kg-1)	TK(g.kg-1)	TC(%)
Jiufeng Mountain（JFS）	Carex pediformis var. pediformis	2	1	2310	40.6853	110.756	1.87	360	6.3	12.43	1.01	87.63	2.88	3.574	0.663	18.668	3.22
		3	1	2300	40.6847	110.757	1.87	360	6.52	20.31	0.8	76.95	5.59	2.692	0.335	19.719	6.722
		2	1	2190	40.6847	110.752	1.87	360	6.51	12.79	1.85	68.93	3.6	2.692	0.335	19.719	6.722
		3	1	2090	40.6867	110.753	1.87	360	7.15	30.16	2.64	110.65	3.57	2.692	0.335	19.719	6.722
		1	1	1380	40.7256	110.726	4.58	313	6.73	18.01	3.36	92.75	4.94	3.202	0.623	17.139	4.535
	Polygonum divaricatum L.	2	1	2270	40.6842	110.756	1.87	360	6.94	56.06	1.65	49.62	4.28	2.692	0.335	19.719	6.722
		1	1	1440	40.6842	110.726	3.41	338	6.89	11.7	0.75	115.15	3.4	3.202	0.623	17.139	4.535
Chunkun Mountain（CKS）	Polygonum divaricatum L.	3	1	1420	40.7269	110.728	4.58	313	6.89	74.37	1.51	27.55	6.29	3.723	0.515	14.123	4.3
		2	1	2300	41.0053	110.603	0.21	342	6.68	72.82	2.12	125.84	7.4	4.895	0.93	17.394	5.54
	Carex pediformis var. pediformis	4	1	2050	41.0083	110.599	0.3	340	6.91	150.02	3.3	123.03	6.32	3.723	0.515	14.123	4.3
