# Supplementary material for: First report of the ectomycorrhizal fungal community associated with two herbaceous plants in Inner Mongolia, China
Source: PeerJ. 2023 Jul 14;11:e15626. doi: 10.7717/peerj.15626 (PMC10351511; doi:10.7717/peerj.15626)
Supplement: Supplemental Information 2 [file peerj-11-15626-s002.xlsx]

## Sheet: BioSampleObjects (1)
The original sequences of 23 samples have been uploaded to SRA database of NCBI
Accession ID	Sample Name	SPUID	Organism	Tax ID	BioProject
SAMN26982404	Carex pediformis var. pediformis.1	sample_1	root metagenome	1118232	PRJNA820163
SAMN26982405	Carex pediformis var. pediformis.2	sample_2	root metagenome	1118232	PRJNA820163
SAMN26982406	Carex pediformis var. pediformis.3	sample_3	root metagenome	1118232	PRJNA820163
SAMN26982407	Carex pediformis var. pediformis.4	sample_4	root metagenome	1118232	PRJNA820163
SAMN26982408	Carex pediformis var. pediformis.5	sample_5	root metagenome	1118232	PRJNA820163
SAMN26982409	Carex pediformis var. pediformis.6	sample_6	root metagenome	1118232	PRJNA820163
SAMN26982410	Carex pediformis var. pediformis.7	sample_7	root metagenome	1118232	PRJNA820163
SAMN26982411	Carex pediformis var. pediformis.8	sample_8	root metagenome	1118232	PRJNA820163
SAMN26982412	Carex pediformis var. pediformis.9	sample_9	root metagenome	1118232	PRJNA820163
SAMN26982413	Carex pediformis var. pediformis.10	sample_10	root metagenome	1118232	PRJNA820163
SAMN26982414	Carex pediformis var. pediformis.11	sample_11	root metagenome	1118232	PRJNA820163
SAMN26982415	Carex pediformis var. pediformis.12	sample_12	root metagenome	1118232	PRJNA820163
SAMN26982416	Carex pediformis var. pediformis.13	sample_13	root metagenome	1118232	PRJNA820163
SAMN26982417	Carex pediformis var. pediformis.14	sample_14	root metagenome	1118232	PRJNA820163
SAMN26982418	Polygonum divaricatum L.1	sample_15	root metagenome	1118232	PRJNA820163
SAMN26982419	Polygonum divaricatum L.2	sample_16	root metagenome	1118232	PRJNA820163
SAMN26982420	Polygonum divaricatum L.3	sample_17	root metagenome	1118232	PRJNA820163
SAMN26982421	Polygonum divaricatum L.4	sample_18	root metagenome	1118232	PRJNA820163
SAMN26982422	Polygonum divaricatum L.5	sample_19	root metagenome	1118232	PRJNA820163
SAMN26982423	Polygonum divaricatum L.6	sample_20	root metagenome	1118232	PRJNA820163
SAMN26982424	Polygonum divaricatum L.7	sample_21	root metagenome	1118232	PRJNA820163
SAMN26982425	Polygonum divaricatum L.8	sample_22	root metagenome	1118232	PRJNA820163
SAMN26982426	Polygonum divaricatum L.9	sample_23	root metagenome	1118232	PRJNA820163
