# Supplementary material for: First report of the ectomycorrhizal fungal community associated with two herbaceous plants in Inner Mongolia, China
Source: PeerJ. 2023 Jul 14;11:e15626. doi: 10.7717/peerj.15626 (PMC10351511; doi:10.7717/peerj.15626)
Supplement: Supplemental Information 3 — After the rarefication, a normalized dataset contained 70 OTUs were identified as EM fungi [file peerj-11-15626-s003.xlsx]

## Sheet: emf_mtriax
Supplementary Table 3. Molecular identification of ectomycorrhizal fungi investigated in this study.
OUT_ID	sequence	qcovs	evalue	pident	ref.UNITE+INSDC.match	kindom	phylum	class	order	family	genu	lineages	C1	C2	C3	C4	C5	C6	C7	C8	C9	J1	J2	J3	J4	J5	J6	J7	J8	J9	J10	J11	J12	J13	J14
OTU_10	AAACCCCTCAAGCTCAGCTTGGTGTTGGGGCCTGCCGCCTGGCAGCCCTTAAAATCAGTGGCGGTGCCATCTGGCTCTAAGCGTAGTAATTCTTCTCGCTATGGAGTCCCGGTGAATGCTTGCCATCAACCCCCAATTTTCTAT	100	5e-67	98.61	KC455325	Fungi	Ascomycota	Leotiomycetes	Helotiales	_	_	helotiales1	0	0	0	0	0	0	0	0	0	1	3	4	6	1	0	1	6	5	74	4	2	4	1
OTU_1013	CACCACTCAAGCCTGGCTTGGTGTTGGGCGACGTCCCCCTTTAGGGACGCGCCTCGAAACGCTCGGCGGCGTGGCACCGGCTTTAAGCGTAGCAGAATCTTTCGCTTTGAAAGTCGGGGCCCCGTCTGCCGGAAGACCTACTCACAA	100	5e-72	100	MK027206	Fungi	Ascomycota	Dothideomycetes	Mytilinidales	Gloniaceae	Cenococcum	cenococcum	0	0	0	0	0	0	0	0	0	0	0	0	0	0	0	0	0	0	0	0	0	0	2
OTU_1050	AATCATCAACCATGTCTATTAGACATTGGCTTGGAGTTGGGAATTGCTGGCTCGTTCAGCTGTCCTGAAATGCATGCTAATTGGACGTGTACACGGCTTGCGACGTGATAATGATCGTTGTGGCTGGAGCACCAAACCAATGTAGGGA	100	1e-72	100	UDB033446	Fungi	Basidiomycota	Agaricomycetes	Boletales	Boletaceae	Retiboletus	boletus	0	0	0	0	0	0	0	0	0	0	0	0	0	0	0	0	0	0	0	0	0	0	2
OTU_1052	TACTCTCACACTCCCACTCTTTTGGATTGGGAGCGGTGGACTTGGGTGTTGCTGCTTTACAGTGGCTCACCTCAAATGGAGTAGTGCAACTCTCGGTTGGACATAGTACGGCGTGATAAGTATCTTCGCCGGCGCCTCACTTGAGGGTGGCCGATTGGGAGCTCTGTGCTTCAAACCGTCTTCGGACAATCTCTGACA	100	6e-97	98.99	FR852358	Fungi	Basidiomycota	Agaricomycetes	Sebacinales	Sebacinaceae	Sebacina	sebacina	0	0	0	0	0	0	0	0	0	0	0	0	0	0	0	0	0	0	0	0	0	0	1
OTU_1083	AAGTTCTCAACCGCATCAAAATTTTTGTTGCGGCTTGGAAATGGAGGTTTATGCAGGCTTGATCAAGTCTGCTCCTCTGAAATGAATTAGTGGTCGTTTGATGGCTCAGGTGTGATATGAAACTATCTATGCCTAATGCTGAACCAAACATCTGCTGCAAAAGAAACCTTTTGATGA	100	5e-73	94.57	JF748097	Fungi	Basidiomycota	Agaricomycetes	Agaricales	Inocybaceae	Inocybe	inocybe	0	0	0	0	0	0	0	0	0	0	0	0	0	0	0	0	0	0	0	0	0	0	2
OTU_1095	TAACCCCTCAAGCTCAGCTTGGTGTTGGGGCCTGCCGTCTGGCAGCCCTTAAAATCAGTGGCGGTGCCATCTGGCTCTAAGCGTAGTAATTTTTCTCGCTACAGAGTTCTGGTGGATGCTTGCCATTAACCCCCAATTTCAAT	97	1e-67	100	GU083254	Fungi	Ascomycota	Leotiomycetes	Helotiales	_	_	helotiales1	0	0	0	0	0	0	0	0	0	0	0	0	0	0	0	0	0	0	0	1	0	0	0
OTU_114	ACACCTCAACTCTCGTGGCTTGCCATGATGAGCTTGGACTTTGGGGGTCTTGTTGGCCTGTGTGCCAGCTCCTCTTAAATGAATTAGCTTGCCGGTGTTTGGTGGCACCATGGGTGTGATAAATATCTACGCTTGTGGTTTCCCACCAGCTAACCTTCAGTGATGGAGGTTCACTGGAGCTTATAAATGTCTCTCCTTGGAGAGGACACATTTTGACC	100	3e-106	98.62	LC364196	Fungi	Basidiomycota	Agaricomycetes	Thelephorales	Thelephoraceae	tomentella	tomentella-thelephora	0	0	0	0	0	0	0	0	0	27	7	1	9	0	64	0	0	0	0	0	0	0	0
OTU_1166	AATCTTCAAAATCCCTCTCTCTTGAGGATTCTTGGACTTGGAGGTTCAATGCTCGCTTTTGCCTTTTAGAAAGCGAGCTCCTCTCAAATGAATCAGTGGGGTCTGCTTTGCCGGTCCTTGACGTGATAAGGTCTTTCTACGTTTTGGATTCGACATCGTCCCGCTTCCAATCGTCCCACGGACAAAAGGATGGTGCTCCGGTCGCGGCCGGACCCACCAAAAAAA	100	7e-112	99.11	MF926568	Fungi	Basidiomycota	Agaricomycetes	Russulales	Russulaceae	Russula	russula-lactarius	0	0	0	0	0	0	0	0	0	1	0	0	1	0	0	0	0	0	0	0	0	0	0
OTU_1213	ACACCTCAACTCTCATGGCTTGCCACGATGAGCTTGGACTTGGGGGGTTTTGCTGGCCTACAGTCAGCTCCCCTCAAATGCATTAGCTTTCCAGCATTTGGTGGCATCACAGGTGTGATAAACATCTACACGTGTGGTTCCCCACCATGTAACCTTCAGTGATGGAGGTTCACTGGAGCTCACAAATGTCTTTCCTCAGTGAAGACAGTTCTTTGATT	100	3e-111	100	JX990047	Fungi	Basidiomycota	Agaricomycetes	Thelephorales	Thelephoraceae	tomentella	tomentella-thelephora	0	0	0	0	0	0	0	0	0	0	0	0	0	0	0	0	0	0	0	0	1	0	0
OTU_129	AATTCTCAACCTTTTTGTCTTTTCCTTAAAGTCGATCAGGCTTGGATGTGGGAGTTTGCGGGCTTTTCTAAAGTCGGCTCTCCTTAAATTTATTAGTAGGGACCTCTGTTGCCTTAGCTTTTGGTGTGATAATTATCTACGCCATCATGTGAAGCAGCTTTAAACTTGGAGGTTACTGCTCTCTAATCGTCTCACATGGGACATTTCCTGACA	100	1e-108	100	KU836585	Fungi	Basidiomycota	Agaricomycetes	Agaricales	Tricholomataceae	Tricholoma	tricholoma	36	1	39	0	0	2	0	0	0	0	0	0	0	0	0	0	0	0	0	0	0	0	0
OTU_1342	ACACCTCAACTCTCGTGGCTTGCCATGATGAGCTTGGACTTTGGGGGTCATGTTGGTCTGTGTGCTAGCTCCTCTTAAATGAATTAGCTTGCCGGTGTTTGGTGGCGCCATGGGTGTGATAAATATCTACGCTTGTGGTTTCCCACCAGCTAACCTTCAGTAATGGAGGTCCACTGGAGCTTATAAACGTCTCTCCTTGGAGAGGACGCATTTTGACC	100	6e-88	93.58	AB848653	Fungi	Basidiomycota	Agaricomycetes	Thelephorales	Thelephoraceae	Tomentella	tomentella-thelephora	0	0	0	0	0	0	0	0	0	1	0	0	0	0	0	0	0	0	0	0	0	0	0
OTU_167	AATACCTCTCAAGCACCATTGCTTGGTCATGGAAGATGAGTATGCTTGCATTCTCCCTTCTGAAATTCAAAGGCGGATCATCTCATATTCCCTGGCGTAGTAAGTGTTTATCTTTCGCTTGGAGTGTGTGACAGTCTTGCCATCGACCCCCATTATTTCAA	100	9e-80	100	KU245940	Fungi	Ascomycota	Pezizomycetes	Pezizales	Pyronemataceae	Wilcoxina	wilcoxina	0	0	0	0	0	0	0	0	0	0	0	0	6	0	0	0	45	0	0	0	0	0	3
OTU_177	TAATCTCACTACAACTACTTTATTGTTGTTTGTATGTGGATCTGGATGTTGCCGTGTAACAAACGGCTCGTCTGAAATGCCTGAGTGTACCCTGCTTTGCGGCGTATTTGGTGTGATAAATCTTCACCGGAGTTGACTTTCGGGTCGCGTCTGCTTAACCATGGCTCTATGCTTCCAACCGTCCTAACAAGACAACCTTTGACA	100	3e-95	97.56	HQ154280	Fungi	Basidiomycota	Agaricomycetes	Sebacinales	Sebacinaceae	Serendipita	serendipita1	0	0	0	0	0	0	0	0	0	0	0	0	0	0	0	0	0	21	0	0	0	0	0
OTU_208	AAAACCACTCAAGTAGTTTTGCTTGGTTATGAAAGAAGAGTTTGCTTGCAAATTCCCTTTCGAAATTCAATGGCGGAGAGTCTCATGATTCCAGCGTAGTAATAACTTATTCGCTTGGTCATTGTAACAATCCTGCCTTAAACCCCCAATTCTAAT	100	5e-77	100	JQ409292	Fungi	Ascomycota	Pezizomycetes	Pezizales	Pyronemataceae	Pustularia	pustularia	0	0	0	0	0	0	0	0	0	14	0	0	0	0	1	0	2	0	0	0	0	0	0
OTU_21	ACACCTCAACTCTCATGGTTTGCCATGATGAGCTTGGACTTTGGGGGTCTTGCTGGCCTATGGTCGGCTCCTCTTAAACGAATCAGCTTGCCAGTGTTTGGTGGCGTCACAGGTGTGATAACTATCTACGCTTGTGGTTTTCCACCAGGTAACCTTCAGTGATGGAGGTTCGCTGGGGCTCACAAATGTCTCTCCTCAGCGAGGACAGCTTTTTAAC	100	9e-111	100	JX630720	Fungi	Basidiomycota	Agaricomycetes	Thelephorales	Thelephoraceae	tomentella	tomentella-thelephora	0	0	0	0	0	0	0	0	0	0	0	0	1	0	0	0	0	1	31	0	8	1	0
OTU_215	ACACCTCAACTCTCATGGTTTGCCATGATGAGCTTGGACTTTGGGGGTCTTGCTGGCCAGTGGTCGGCTCCTCTCAAACGAATCAGCTTGCCAGTGTTTGGTGGCATCACGGGTGTGATAACTATCTACGCTTGTGGTTTTCCGCCAGATAACCTTCAGTGACATGGAGGTTTGCTGGAGCTCATAAATGTCTCTCCCCAGCGAAGACAGCTTTGTGAAC	100	2e-112	100	EU516905	Fungi	Basidiomycota	Agaricomycetes	Thelephorales	Thelephoraceae	tomentella	tomentella-thelephora	0	0	0	0	0	0	0	0	0	0	0	8	1	0	0	0	0	0	0	0	0	0	2
OTU_237	ACACCTCAACTCCTTATGGTCTTCCATGATGAGCTTGGACTTTGGGGGTTTTGCTGGCCTACAGTCAGCTCCTCTAAAATAAATCAGCTTACCGGTGTTTGGTGGGTATCATGGGTGTGATAACTATCTACGCTCGTGGTTTTCCACCAGGTAACCTTCAGCAGTGGAGGTTCACTGGAGCTCATAGATGTCTCTCCTCAGCGAGGACAGCCCTTTGAAT	100	2e-112	100	JX316236	Fungi	Basidiomycota	Agaricomycetes	Thelephorales	Thelephoraceae	tomentella	tomentella-thelephora	0	0	0	0	0	0	0	0	0	0	0	0	0	0	0	0	0	0	1	0	0	0	0
OTU_241	AATACCACTCAAGCTCTTCTGCTTGGTCATGGAAGGAGAGTATGCTTGCATCCTCTCTTCTGAAATCGAATGGCGGACTGCCTCATGTGCCTCGCGTAGTAAGTTCATCTTTTCGCTTGGAGTGTGAGATAGTCTCGCCATCAACCCCCATACTTCTAA	100	5e-77	99.37	KY322526	Fungi	Ascomycota	Pezizomycetes	Pezizales	Pyronemataceae	Wilcoxina	wilcoxina	0	0	0	0	0	0	0	0	0	11	0	0	14	0	0	0	0	0	0	0	0	0	0
OTU_25	TAACCCCTCAAGCTCAGCTTGGTGTTGGGGCCTGCTGCACTGGCAGCCCTTAAAATCAGTGGCGGCGCCATCTGGCTCTAAGCGTAGTAATTCTTCTCGCTATGGAGTCCTGGTGGATGCTTGCCATCAACCCCCAATTTTTCTAT	100	2e-71	100	UDB0751796	Fungi	Ascomycota	Leotiomycetes	Helotiales	_	_	helotiales1	111	135	1	10	2	88	0	129	0	3	92	0	24	151	3	0	56	39	0	92	48	29	53
OTU_259	ACACCTCAACTCTCACGGTTCGCCGTGACGAGCTTGGACTTTGGAGGCTTTGCTGGCCTGTGGGTCGGCTCCTCTCAAATGAATCAGCTTACCGGTGTATTGGTGGCGTCACAGGTGTGATAACTATCTACGCTTGCGGTCGCCCGCCAGACAACCTCTGCCATCGTCGGAGGTTTGCCGGAGGCTCACAAACGTCTCCCGAGCGGAGACAGCCTTCTGAAC	100	2e-113	100	JQ991887	Fungi	Basidiomycota	Agaricomycetes	Thelephorales	Thelephoraceae	tomentella	tomentella-thelephora	0	0	0	28	0	0	0	0	0	0	0	0	0	0	0	0	0	0	0	0	0	0	0
OTU_26	ACACCTCAACTCTCATGGCTCGCCATGATGAGCTTGGACTTTGGGGGTCTTGCTGGCCTGTGGTCGGCTCCTCTCAAATGGATCAGCTTGCCAGTGTTTGGTGGCATCACAGGTGTGATAACTATCTGCGCTTGTGGTTTTCCATCAGATAACCTTCAGTGATGGAGGTTCGCTGGAGCTCATAAACGTCTCCCCTAAGCGGGGACAGCCCTTTGAAT	100	3e-111	100	HQ331012	Fungi	Basidiomycota	Agaricomycetes	Thelephorales	Thelephoraceae	_	tomentella-thelephora	0	0	3	0	0	0	0	0	0	17	55	141	4	1	0	147	38	87	38	28	71	98	58
OTU_262	ACACCTCAACTCTCGTGGTTTGCTACGATGAGCTTGGACTTTGGGGGTTTTGCTGGCCTGTGGTTGGCTCCTCTCAAATGAATCAGCTTCCCAGTGTTTGGTGGAGCCGCAGGTGTGATAACTATCTACGCTTGCGGTTTTTCACCAGATAAACCTTCGGTGACGGAGGTTCGCTGGGGCTCATAAATGTCTCTCCTCAGTGAAGACAGCTTTTGAAC	98	2e-107	99.53	JX630702	Fungi	Basidiomycota	Agaricomycetes	Thelephorales	Thelephoraceae	tomentella	tomentella-thelephora	0	0	0	0	0	0	0	0	0	0	0	0	0	0	0	0	0	0	1	0	0	0	0
OTU_264	ACACCTCAACTCTTCATGGTTTTCCATGATGAGCTTGGACTTTGGGGGACTTGCTGGCCTACAGTCAGCTCCTCTAAAATAAATCAGCTTGCCAGTGTTTGGTGGGTATCGCAGGTGTGATAACTATCTACGCTTGTGGTTTTCCACCAAGTAACCTTCAGCAGTGGAGGTTCACTGGAGCTCACAGACGTCTCTCCTCAGTGAGGGACAGCCCTTTGAAT	100	6e-113	100	KX510027	Fungi	Basidiomycota	Agaricomycetes	Thelephorales	Thelephoraceae	_	tomentella-thelephora	0	0	0	0	0	0	0	0	0	8	0	0	4	0	0	0	0	0	0	0	0	0	0
OTU_270	AATTCTCAACCCCTCTCGATTTGCTTCGAAAGGGTGCTTGGATAGTGGGGGCTGCCGGAGATCTGGACTTCTCGTCTAGGACTCGGGCTCCCCTGAAATGAATGGGCTTGCGGTCGACTTTCGACTATGCATGACAAGGCTTTTGGCGTGATAATGATCGCCGCTCGCCGAAGTGCATGAATGAACGGTCCCGTGCCTCTAATGCGTCGATGCCTTCTGGCGTCTTCCTTATTGAC	100	3e-121	100	KT964686	Fungi	Basidiomycota	Agaricomycetes	Boletales	Suillaceae	Suillus	suillus-rhizopogon	0	0	0	0	0	0	0	0	0	0	0	0	19	0	0	0	0	0	0	0	0	0	0
OTU_277	TCCTTTCAATTATCAAACTTTTACATATAGAGATATATGTAAAGATGTTTGGAATACAATTGAGAAAAGTAGTATTCTTTATAGTATTGCTTTCTTAAAAACCAGAAATACTATGTTTTGATTTTTCTTCACCTCATTTTGTATATTATTTAACAAATGAGTACGAGTAAAAATATACAATACTTT	100	6e-92	99.46	UDB027509	Fungi	Ascomycota	Pezizomycetes	Pezizales	Pezizaceae	Pachyphlodes	pachyphloeus-amylascus	0	0	0	0	0	0	0	0	0	0	0	0	1	1	1	0	1	0	0	0	1	0	0
OTU_284	TACTCTCACACTCCCACTCTTTTGGAGCGGGAGCGGTGGACTTGGGTGTTGCTGCTTTGCGGTGGCTCACCTCAAATGGAGTAGTGCAACTCTCGGTTGGACATAGTACGGCGTGATAAGTGTCTTCGCCGGCGCCTCACTTGAGGGTGGCCGATCGGGAGCTCTGTGCTTCCAACCGTCTTCGGACAATCTCTGACA	100	3e-90	96.97	KY684557	Fungi	Basidiomycota	Agaricomycetes	Sebacinales	Sebacinaceae	sebacina	sebacina	0	0	0	0	0	0	0	0	0	3	0	0	0	0	0	0	0	0	0	0	0	0	0
OTU_299	CAAGTTCTCAACCACATCAATTTCAATGTGGCTTGGATGGTGGGGGTTCTTTTTGCAGGCTTCTGTAAATATGAAGTCGGCTCCCCTGAAATGTATTAGTGGTATCTGAGCTACTACAGGTGTGATAACTATCTATGCCTTGGTATGCTGCATGAAACAGATTGCGCCGCTTCTAACAAGTGGGAAACACAATTTTGATGA	100	7e-102	100	MG367267	Fungi	Basidiomycota	Agaricomycetes	Agaricales	Inocybaceae	Inocybe	inocybe	0	0	0	0	0	0	0	24	0	0	0	0	0	0	0	0	0	0	0	0	0	0	0
OTU_300	AAATCTCAACCTCCTTTGTTCCTTCCGAGGATCAAAGGAGGCTTGGACTTTGGAGGTCTTTGCTGGCGTCTTTAAAGGCCAGCTCCTCTCAAATGAATTAGCGGGGTCCTCTTTGCCGATCCTTGACATGTGATAAGATGCTTCCGTGTCTTGGTTTTCTGGCTCTGTTGCCTTTGGGACCCGCTTCTAATCGTCTTGACCTTGCGTCGAGACAATGTTCGAGCTCGTCTCCCTTCTCGGGAAACCCCCTCGACCCCACGAAC	100	3e-131	98.86	MK351975	Fungi	Basidiomycota	Agaricomycetes	Russulales	Russulaceae	Lactarius	russula-lactarius	0	0	0	11	0	0	0	0	0	0	0	0	0	0	0	0	0	0	0	0	0	0	0
OTU_319	ATATATCAACCTTCTTTGGTTGGATGTGGGTTTGCTGGCCTCCCCGAGGTCAGCTCCCCTTAAATGCATTAGCGGACAACATTTTGCCAACTGTTCATTGGTGTGATAATTATCTACGCTATTGACGTGAAGCAATGTTCAGCTTCTAACAGTCCATTGACTTGGACAAATTTACTTTTATTA	100	6e-92	100	MK512081	Fungi	Basidiomycota	Agaricomycetes	Agaricales	Cortinariaceae	Cortinarius	cortinarius	0	0	0	0	0	0	0	0	0	0	0	0	0	3	0	0	0	0	0	0	0	0	0
OTU_331	CAAGTTCTCAACCACATCAATTTTGATGTGGCTTGGATGGTGGGGGTTCTTTTTGCAGGCTTCTGTAAATATGAAGTCGGCTCCCCTGAAATATATTAGTGGTATCTGAGCTACTACAGGTGTGATAATTATCTATGCCTTTGGTATGCTGCATGAAACAGATTGCGCCGCTTTCTAATCAGTGGAAAACACAATTTTGATGA	100	2e-101	99.51	UDB0754141	Fungi	Basidiomycota	Agaricomycetes	Agaricales	Inocybaceae	Inocybe	inocybe	0	0	0	0	0	0	0	0	0	0	0	0	0	0	3	0	0	0	0	0	0	0	0
OTU_340	GACTTGTCTCAACCACAGATTTCTAATTTGTGGCTTGGATGTGGGGGATTGTGGGCTTCTTTTCATAGTCTGCTCCTCTGAAATGAATTAGTGGTGTCTGAGCTGCTATTGGTGTGATAAATATCTATGCCTCTGGTATGCCTGTCAGGACTGCTCATAACAAACAACAGCTGTTTGACGA	88	1e-43	86.98	UDB014217	Fungi	Basidiomycota	Agaricomycetes	Agaricales	Inocybaceae	Inocybe	inocybe	0	0	0	0	0	0	0	0	0	0	0	0	2	0	0	0	0	0	0	0	0	0	0
OTU_343	TAACCCCTCAAGCTCAGCTTGGTGTTGGGGCCTGCCGTCTGGCAGCCCTTAAAATCAGTGGCGGTGCCATCTGGCTCTAAGCGTAGTAATTTTTCTCGCTACAGAGTTCTGGTGGATGCTTGCCATCAACCCCCAATTTTCTAT	100	2e-70	100	GU083271	Fungi	Ascomycota	Leotiomycetes	Helotiales	_	_	helotiales1	0	0	0	0	0	0	0	0	0	0	1	0	0	1	0	1	0	2	0	0	0	0	0
OTU_379	AATCTTCAAAATCCCTCTCTTTTGAGTGATTTTTGGACTTGGAGGTTCAATGCTCGCTTTTGCCTTTTAGAAAGCGAGCTCCTCTCAAATGAATCAGTGGGGTCTGCTTTGCCGGTCCTTGACGTGATAAGATCTTTCTACGTTTTGGATTCGACATTGTCCCGCTTCCAATCGTCCCACGGACAAAGGGATGGTGCTCCGGTCGTGGCCGGACCCACCAAAAAAA	100	2e-112	99.12	JQ975975	Fungi	Basidiomycota	Agaricomycetes	Russulales	Russulaceae	Russula	russula-lactarius	0	0	0	0	0	0	0	0	0	6	0	0	2	0	0	0	0	0	0	0	0	0	0
OTU_425	AATTCTCAACCCCTCTCGATTTGCTTCGAGCGGGTGCTTGGATGTTGGGGGCTGCCGGAGACACTGGATTTCGTCCAGGACTCGGGCTCCTCTTAAATGAATCGGCTCGCGGTCGACTTTCGACTTTGCATGACAAGGCCTTTGGCGTGATAATGATCGCCGTTCGCCGAAGTGCAAGACAGAATGGTCCCGTGCCTCTAATGCGTCGACGCCTCTAGGGGCGTCTTCCTCATTGAC	100	8e-122	100	LC013805	Fungi	Basidiomycota	Agaricomycetes	Boletales	Suillaceae	Suillus	suillus-rhizopogon	0	0	0	0	0	0	0	0	0	0	0	0	4	0	0	0	0	0	0	0	0	0	0
OTU_434	TAACCACTCAAGCCTAGCTTGGTCTTGGGGTTCGCGGTCTCGCGGCCCTTAAAATCAGTGGCGGTGCCGCCTGGCTCTAAGCGTAGTAATTCTCTCGCTATAGAGTCTAGGTGGTTACCTGCCAGAACCCCCCCTCTTAC	100	3e-68	100	HE979376	Fungi	Ascomycota	Leotiomycetes	Helotiales	Helotiaceae	Meliniomyces	meliniomyces	0	0	0	0	0	0	0	0	0	0	0	0	0	0	0	0	0	0	0	1	1	0	1
OTU_436	AATTCTCAACCCCACCGATTTGTTTTGGGGGGATTGGACTTGGAGCGTGCTGGCGAAGGTCGGCTCCTCTTTAAATGCATCAGTGGAGAGAAACTTGCCCCAGTGTGATAATCCTGTTGCGCTGCGGTGGGCGAAAGTCCGCTTCCAACCGTCCTCCGGGACGTACGCCATCTTTA	100	2e-81	97.73	FJ803931	Fungi	Basidiomycota	Agaricomycetes	Atheliales	Atheliaceae	Amphinema	amphinema-tylospora	0	0	0	0	0	0	0	0	0	0	0	0	0	0	0	0	0	0	0	0	0	1	0
OTU_442	AATTCTCAACCCCTCTCGATTTGCTTCGAGAGGGCGCTTGGATGGTGGAGGCTGCCGGAGACCTGGATTCGTTCAGGACTCGGGCTCCTCTGAAATGAATCGGCTTGCGGTCGACCCTTCGACTTTGCATGACAAGGCCTTTGGCGTGATAATGATCGCCGTTCGCCGAAGTGCACGACAGAAAACGGTCCCGCGCCTCTAATGCGTCGACGCCTTCCGGGCGTCTTCCTCATTGAC	100	8e-122	100	UDB0778689	Fungi	Basidiomycota	Agaricomycetes	Boletales	Suillaceae	Suillus	suillus-rhizopogon	0	0	0	0	0	0	0	0	0	0	0	0	1	0	0	0	0	0	0	0	0	0	0
OTU_446	ACACCTCAACTCTCATGGTTCGCCGTGATGAGCTTGGACTCTGGGGGTTTTGCTGGCCTGCGGTCGGCTCCCCTCAAATGAATCAGCCTCCCAGTGTTTGGTGGCATCACGGGTGTGATAAATATCTACGCTCGCGGTTGTCTGCCAGGTAACCTTTGGCGACAAAGGTTCGCTGGAGCTCACAGATGTCTCTCCTCGGCGAGGACAGCTTTTTGAAC	100	3e-111	100	UDB028296	Fungi	Basidiomycota	Agaricomycetes	Thelephorales	Thelephoraceae	Tomentella	tomentella-thelephora	2	0	0	0	0	0	0	0	0	0	0	0	0	0	0	0	0	0	0	0	0	0	0
OTU_447	ACACCTCAACTCTTCATGGTTTTCCATGATGAGCTTGGACTTTGGGGGTTTTGCTGGCCTGTGGTCAGCTCCTCTCAAATGAATCAGCTTGCCGGTTTTTGGTGGGCATCACAGGTGTGATAACTATCTACGCTTGTGGTTTTCCACCAGGGTAACCTTCAGCAGTGGAGGTTCACTGGAGCTTACAAATGTCTCTCCTCTGTGAGGACAGCCCTTTGAAT	100	1e-109	99.1	UDB025899	Fungi	Basidiomycota	Agaricomycetes	Thelephorales	Thelephoraceae	_	tomentella-thelephora	0	0	0	0	0	0	0	0	0	0	0	0	0	0	0	0	0	0	0	0	5	0	0
OTU_448	TAATCTCACTACGACCACTTTATTGTTGTTTGTATGTGGACTTGGATGTTGCCGTGTAACAAACGGCTCGTCTGAAATGCCTGAGTGTACCCTGCTTTTGCGGCGTATTCGGTGTGATAAATCTTCACCGGAGTTGACTTTCGGGTCGCGCTTGTATTGTCAGGCCCTATGCTTCCAACCGTCCTAACAAGACAATCTCTGACA	100	1e-103	100	GU189693	Fungi	Basidiomycota	Agaricomycetes	Sebacinales	Sebacinaceae	serendipita	serendipita1	0	0	0	0	0	0	0	0	0	0	0	0	0	0	0	0	0	0	0	12	0	0	0
OTU_451	AATTATCAACCTCTCCTAGCTTTTCTATGAGCTAGTGAGAGGCTTGGATGTGGGGGTTCTTTTGCTGGCTTCAAAGAATGAGGTCGGCTCCCCTGAAATGCATTAGCGGAATCCCATGTGAACCGTCTATTGGTATGATAATTATCTATGCCGTTGACGTGACGCACTTTTGTAATGGGTGTTCAGCTTCTAACAGTCCATTGAATTGGACAATACTTAAATGACA	100	2e-112	99.12	KU685725	Fungi	Basidiomycota	Agaricomycetes	Agaricales	Tricholomataceae	Laccaria	laccaria	0	0	0	0	0	0	0	0	0	0	0	0	0	0	0	0	0	0	0	8	0	0	0
OTU_453	ACACCTCAACTCTCATGGTTCGCCATGATGAGCTTGGACTTTGGGGGTCTTGCTGGCCTACGGTCGGCTCCTCTCAAATGAATCGGCTTGCCAGTGTTTGGTAGAGTCGCAGGTGTGATAACTATCTACGCTTGTGGTTTTCTGCCAGATAACCTTCAGTGATGGAGGTTCGCTGGAGCTCATAAACGTCTCCCCTAAGCGGGGACAGCCCTTTGAAT	99	4e-94	95.39	JF748114	Fungi	Basidiomycota	Agaricomycetes	Thelephorales	Thelephoraceae	Tomentella	tomentella-thelephora	0	0	0	0	0	0	0	0	0	0	0	0	0	0	1	1	0	1	0	0	0	0	0
OTU_46	AATTCTCAACTACAATGATTTCTTCAGTGTAGCTTGGATTTGGGGGACTTTGGCATCTAGAAGTCAGCTCCCCTGAAATTGATTAGCGGTACCTTTGTAGACCATCTACAGGTGTGATAATTGTCTACACCTTAGTTGTCTGAATGCTGCTTCCAACTTGAGTTTTGGAACTCGTGACAA	100	3e-90	100	MG367270	Fungi	Basidiomycota	Agaricomycetes	Agaricales	Inocybaceae	Inocybe	inocybe	0	1	116	0	3	20	0	1	0	0	0	0	0	0	0	0	0	0	0	0	0	0	0
OTU_474	ACACCTCAACTCTCATGGCTCGCCATGATGAGCTTGGACTTTGGGGGTCTTGCTGGCCTGTGGTCGGCTCCTCTCAAATGGATCAGCTTGCCAGTGTTTGGTGGCATCACAGGTGTGATAACTATCTACGCTTGTGGTTTTCTGCCAGATAACCTTCAGTGATGGAGGTTCGCTGGAGCTTATAAATGTCTCTCCCCAGTGAGGACAGCTTTTTGAAC	100	6e-98	96.33	JF748114	Fungi	Basidiomycota	Agaricomycetes	Thelephorales	Thelephoraceae	Tomentella	tomentella-thelephora	0	0	0	0	0	0	0	0	0	0	0	0	0	0	0	0	0	0	0	0	0	0	4
OTU_491	ACACCTCAACTCTCATGGTTTGCCATGATGAGCTTGGACTTTGGGGGTCTTGCTGGCCAGTGGTTGGCTCCTCTCAAACGAATCAGCTTGCCAGTGTTTGGTAGAGTCGCAGGTGTGATAACTATCTACGCTTGTGGTTTTCTGCCAGATAACCTTCAGTGATGGAGGTTCGCTGGAGCTTATAAATGTCTCTCCCCGGTGAGGACAGCTTTTTGAAC	100	1e-99	96.79	JF748114	Fungi	Basidiomycota	Agaricomycetes	Thelephorales	Thelephoraceae	Tomentella	tomentella-thelephora	0	0	0	0	0	0	0	0	0	0	0	0	0	0	0	0	0	0	0	0	0	0	4
OTU_509	ACACCTCAACTCTCATGGTCTTCCATGATGAGCTTGGACTTTGGGGGTTTGCTGGCCCTGCGGCCGGCTCCTCTCAAATGAATCAGCTTGCCAGTGTTTGGTGGCATCACGGGTGTGATAACTATCTACGCCCGCGGTCGTCTGCCAGGTAACCCTCAGCGATGAGGGTTCATTGGAGCTCATAAACGTCTCTCCTCGGCGAGGACAACTTTTGAAC	100	4e-109	99.54	LC145311	Fungi	Basidiomycota	Agaricomycetes	Thelephorales	Thelephoraceae	Tomentella	tomentella-thelephora	0	0	0	0	0	0	0	0	0	0	0	0	1	0	0	0	5	0	0	0	0	0	0
OTU_510	ACACCTCAACTCTTGCGGTTTGCCGTGATGAGCTTGGACTTTTGGGGGTTTTGCTGGCCACGGTCGGCTCCTCTGAAATGGATCAGCTTGCCAGTGTTTGGTGGCGTCATGGGTGTGATAACTATCTACGCTTGTGATAGCTCGCCAAGTAACCTTCAGAGATGGAGGTTTGCTGGAGCTTATAAATGTCTCTCCTCTCAGTGAAGACAGCTTTTTGACC	100	2e-112	100	JX630835	Fungi	Basidiomycota	Agaricomycetes	Thelephorales	Thelephoraceae	_	tomentella-thelephora	3	0	0	0	0	0	0	0	0	0	0	0	0	0	0	0	0	1	0	0	0	1	0
OTU_561	TACTCTCACACTTCCGATCTTTGGATTGGGAGCGGTGGACTTGGGTGTTGCTGCTTACTGTGGCTCACCTCAAATCGATTCGTGCACCTCTTGGTTGGACATAGTACGGCGTGATAAGTGTCTTCGCCGGCACCTCAGTAGAGGGTGGCTGATCGGGAGCTCTGTGCTTCAAACCGTCCTCGGACAACAACTGACA	100	4e-99	100	KF000675	Fungi	Basidiomycota	Agaricomycetes	Sebacinales	Sebacinaceae	Sebacina	sebacina	0	0	0	0	0	4	0	0	0	0	0	0	0	0	0	0	0	0	0	0	0	0	0
OTU_591	AAGTTCTCAACCGCATCAAAATTTTTGTTGCGGCTTGGAAATGGAGGTTTATGCAGGCTTGATCAAGTCTGCTCCTCTGAAATGAATTAGTGGTCGTTTGATGGCTCTTTACTTAGGTGTGATAAAACTATCTATGCCTAATGCTGAACCAAACATCTGCTGCAAAGAAACCTTTTGATGA	100	8e-91	100	JF748097	Fungi	Basidiomycota	Agaricomycetes	Agaricales	Inocybaceae	Inocybe	inocybe	0	0	0	0	0	0	0	0	0	0	0	0	0	0	0	0	0	0	0	0	0	0	7
OTU_6	ACACCTCAACTCTCATGGTTCGCCGTGATGAGCTTGGACTTCTGGAGGTTTTGCTGGCCTTTGGTCGGCTCCTCTCAAACGGATCAGCTTGCCAGTGTTTGGTGGCGTCATGGGTGTGATAAATATCTACGCTTGTGGCCGTCTGCCAGGTAACCTTCAGCGATGGAGGTTCACTGGAGCTCACAAAGGTCTTCCTCAGCGAAGACAGCTTTTTGAAC	100	1e-109	99.54	MK602776	Fungi	Basidiomycota	Agaricomycetes	Thelephorales	Thelephoraceae	Thelephora	tomentella-thelephora	3	16	0	109	154	36	159	5	159	0	0	0	0	0	0	0	0	0	0	0	0	0	0
OTU_602	AATTCTCAACCTTATTAGCTTTTGTTGATAATGGATTGGATGTGGGGGTTTCTTTTGCTGGCTTCTTCACAGATATCAGCTCCCCTTAAATGCATTAGCTGGTGCCCCGCGTGGACCATCTATTGGTGTGATAATTATCTACGCCGTGGATGTCTGCAATCATATGGGTTTTGCACTGCTTCTAACCGTCTGTTCATTCGGACAATACATGACA	100	4e-109	100	KU924076	Fungi	Basidiomycota	Agaricomycetes	Agaricales	Hymenogastraceae	Alnicola	hebeloma-alnicola	0	0	0	0	0	0	0	0	0	0	0	0	0	0	0	0	0	2	0	0	0	0	0
OTU_610	AACTTCTCAACCACATCAGTATCTGATGATGGCTTGGATGTGGGGGTTGTTTGCAGGCCTCTGTAAAAAAGATGGTCGGCTCCCCTAAAATGCATTAGTGGTATCTGAGGCTATTACTATCAGGTGTGATAATTATCTATGCCTTTGGTATGCTGCATGAACAGATTACACTGCTTCTAACAAAAAACAATTTTGATGA	100	2e-72	91.63	KM402940	Fungi	Basidiomycota	Agaricomycetes	Agaricales	Inocybaceae	Inocybe	inocybe	0	1	0	0	0	0	0	0	0	0	0	0	0	0	0	0	0	0	0	1	0	0	0
OTU_657	AATTCTCAAAACCCTTTTTCTTTTTGAGGAAGGGCTTTGGATTTGGAGGCCTTTTGCTGGTTTCACGTCGAAGCCAGCTCCTCCTAAATGAATTAGTGGGGTTCGCTTTTGTCGATCCTTGACGTGATAAGATGTTTCTGCGTCTTGGGTTTGGCACTGTTGCCCGCTTCTAACCGTCTCATGGACAACGATGGTGCTCCGGTCGCCGCCTCTCCGTAGGTGGTCGGCTTGACCCACGAAAAAA	100	1e-100	93.85	MG687355	Fungi	Basidiomycota	Agaricomycetes	Russulales	Russulaceae	Russula	russula-lactarius	1	0	0	0	0	0	0	0	0	0	0	0	0	0	0	0	0	0	0	0	0	0	0
OTU_67	AATTCTCAACCTTTTCAGCTTTTTCTGTTGATCAGGCTTGGATGTGGGAGTATGCGGGCTTCTCAGAAGTCGGCTCTCCTGAAATGCATTAGCGGGACCTTTGTTGCCTTGCTTTGGTGTGATAATTATCTACGCCATTTGTGAAGAGCAGCTTTATAAATGGGGTTCAGCTTCTAAAGGGTCTCTTTTGAGACAGCTTCTGACA	100	4e-104	100	MF034240	Fungi	Basidiomycota	Agaricomycetes	Agaricales	Tricholomataceae	Tricholoma	tricholoma	0	0	0	0	0	9	0	0	0	65	0	0	58	1	84	0	0	0	0	4	0	0	0
OTU_695	ACACCTCAACTCTCATGGCTTTGCCATGATGAGCTTGGACTTTGGGGGTCTTGCTGGCCTGTGGTCGGCTCCTCTCAAATGAATTAGCTTGCCAGTGTTTGGTGGCATCACAGGTGTGATAACTATCTACGCTTGTGGTTTTCCACCAGGTAACCTTCAGTGATGAAGGTTCGCTGGGGCTCATAAATGTCTCTCCTCAGCGAGGACAGCTCTTTCAAC	98	3e-106	99.07	EU403099	Fungi	Basidiomycota	Agaricomycetes	Thelephorales	Thelephoraceae	_	tomentella-thelephora	0	0	0	0	0	0	0	0	0	0	0	0	0	0	0	0	0	0	0	2	0	0	0
OTU_702	AGCTCTCAACTACAACTAGATTTATTCTAGCTGTAGCTTGGATGTGGGGGTTATCTTTGCAGGCTTCAGATATAATTGAAGTCAGCTCCCCTAAAATGTATTAGTGGTCTCTGAGCAGAGAAAACGGTGTGATAATTATCTATGCCTTAGTACTTTGCATGAACTGCTTCATAATCTTATGATAATGTTTGACAA	88	1e-73	95.45	AB587748	Fungi	Basidiomycota	Agaricomycetes	Agaricales	Inocybaceae	Inocybe	inocybe	0	0	0	0	0	0	0	0	0	0	0	0	0	0	0	0	0	0	0	0	0	0	3
OTU_713	GAAACTCTCAAATCAGGGTAGCTTTATAGCTGTCTCTGTTTGGATTTGGACTTTGCTGCATTAATGTGGCTAGTCTTAAATGCATTAGCTGGTCCTCATTGAGGTTTGGTTCCACTCGGCGTGATAATTATCTAACGTTGAGGACAGTCTTAGGACTGGCCATGGCTCTCTCTGGATTGCTTCTAAATTGTCTTCAGGACAGTCACTTAAT	100	4e-99	97.63	MH379959	Fungi	Basidiomycota	Agaricomycetes	Cantharellales	Hydnaceae	Hydnum	cantharellus	0	0	0	0	0	0	0	0	0	0	0	0	0	0	0	0	0	0	0	0	0	0	5
OTU_740	TAATGTCTCAACTGCATCCCCTTGGGGGCGGGGTGTGGCTTGGATCTGGGGGAGGCAGGCTCTTGTGGTCTGCTCCCCTGAAATGCATAAGCGGCGTCCCATGGCCTCTGCCTAAGGTGTGATAATTCTATCTGCATCTGCATGTCGTGCCGCTGCTGGGTTGGTTGTTAATTTATTTATTTTTGA	94	5e-73	95.4	UDB025930	Fungi	Basidiomycota	Agaricomycetes	Agaricales	Inocybaceae	Inocybe	inocybe	0	4	0	0	0	0	0	0	0	0	0	0	0	0	0	0	0	0	0	0	0	0	0
OTU_766	ACAACCAGTTCAATCCCTCTTAGAGAATATTTGGGGGATTGGTTATTGGTGAATGAGGGGATGCGTGCATCACGTTGAATCACCTCACCACCGAAATTCAGAGGCGGTTTGTCCCCACGTGTTTGTGGCGTTGTAAAGGCTTACCAGCACTATTCGCTCGCATCGTGGGTGCACTGCTTGCCATTGGAGAAATCCCCATTCATCAAA	100	7e-102	99.03	KT692924	Fungi	Ascomycota	Pezizomycetes	Pezizales	Pyronemataceae	Humaria	genea-humaria	0	0	0	1	0	0	0	0	0	0	0	0	0	0	0	0	3	0	0	0	0	0	3
OTU_782	TAACCCCTCAAGCTCAGCTTGGTGTTGGGGCCTGCCGTTTGGCAACCCTTAAAATCAGTGGCGGTGCCACCTGGCTCTAAGCGTAGTAATTCTTCTCGCTACAGAGTCCTGGTGGATGCTTGCCATCAACCCCCAATTTTCTAT	100	1e-68	99.31	GU083271	Fungi	Ascomycota	Leotiomycetes	Helotiales	_	_	helotiales1	0	0	0	0	0	0	0	0	0	0	0	0	0	0	0	0	0	0	0	0	0	1	0
OTU_818	AAAACCACTCAAGTAGTTTTGCTTGGTTATGAAAGAAGAGTTTGCTTGCAAATTCCCTTTCGAAATTCAATGGCGGAGGGTCTCATGATTCCGGCGTAGTAATAACTTATTCGCTTGGTCATTGTGACAATCCTGCCTCAAACTCCCAATTCTAGT	100	1e-73	98.72	UDB026630	Fungi	Ascomycota	Pezizomycetes	Pezizales	Pyronemataceae	Pustularia	pustularia	0	0	0	0	0	0	0	0	0	0	0	0	0	0	0	0	0	0	0	0	0	0	1
OTU_831	TACTCTCACACTCCCAATCTCTTTGGATTGGGAGCGGTGGACTTGGGTGCTGCCGCTTGACTGAGGCTCACCTGAAATATGTTAGTGCATCTCTTGATTGGACATAGTACGGCGTGATAAGTGTCTTCGCCGGCTCCTCGCAAAGAGGGTGGCCGATCGGGAGCTCTGTTGCTTCAAACAGTCTTCGGACAATCTTCTGACA	100	4e-99	99.01	KX497194	Fungi	Basidiomycota	Agaricomycetes	Sebacinales	Sebacinaceae	Sebacina	sebacina	0	0	0	0	0	0	0	0	0	0	0	0	0	0	0	0	0	0	0	0	0	0	3
OTU_860	AATACCTCTCAAGCAGATTTGCTTGGTCTTGGAAGATGAGTTTGCTTGCATTCTCCCTTCTGAAATTCAAAGGCGGATGATCTCATATCCCCAGGCGTAGTAAGATTATCTTTTCGCATGGTGTGTGTGATAGTCCAGCCGTCGACCCCCAATTTTTTCAA	100	9e-80	100	GU181879	Fungi	Ascomycota	Pezizomycetes	Pezizales	Pyronemataceae	Trichophaea	wilcoxina	0	1	0	0	0	0	0	0	0	0	0	0	0	0	0	0	0	0	0	0	0	0	0
OTU_88	CACCACTCAAGCCTGGCTTGGTGTTGGGCGACGTCCCCTTTGGGGACGCGCCTCGAAACGCTCGGTGGCGTGGCACCGGCTTTAAGCGTAGCAGAATCTTTCGCTTCAAAAGTCGGGGCCCCGTCTGCCGGAAGACCTACTCGCAA	100	2e-71	100	KC967393	Fungi	Ascomycota	Dothideomycetes	Mytilinidales	Gloniaceae	Cenococcum	cenococcum	0	0	0	0	0	0	0	0	0	1	0	0	0	0	0	0	1	0	4	1	0	0	3
OTU_890	TACTCTCACACTTCCGATCCTTGGATTGGGAGCGGTGGACTTGGGTGTTGCTGCTTTACTGTGGCTCACCTTAAATGCATTAGTGCAACTCTTGGTTGGACATAGTACGGCGTGATAAGTATCTTCGCCGGCACCTCGCAAGAGGGTGGCTGATCAGAGCTCTGTGCTCTCCAACCGTCTTCGGACAACCACTGACA	100	5e-93	97.97	UDB013512	Fungi	Basidiomycota	Agaricomycetes	Sebacinales	Sebacinaceae	Sebacina	sebacina	1	0	0	0	0	0	0	0	0	0	0	0	0	0	0	0	0	0	0	0	0	0	0
OTU_898	AATTCTCAAACCTCTCAAATTTAGAGGAGAGAGGGTTTGGACTTGGAGTGTGCTGGGTCATGTCAGCTCCTCTTAAATGCATTAGCTTGTACTCTTGTGGATGGGCTTTGGTTTGATAATATCTATGCCATTGCTGTGAAACAAATATCAGCTTCTAACACCCCATACTTTATTATAT	100	3e-89	100	JF908069	Fungi	Basidiomycota	Agaricomycetes	Agaricales	Hygrophoraceae	Hygrophorus	hygrophorus	0	0	0	0	0	0	0	0	0	0	0	0	0	0	1	0	0	0	0	0	0	0	1
OTU_90	TACTCTCACACTCTAATTTGGAGAAGTGGACTTGGGTGTTGCTGCTTTGGGTGGCTCATCTTAAATATGCTAGTGCAACTCATGGTTGGATATAGTACAGCGTGATAAGTATCTTCGCTGGCGCCTTGTGAAGAGGGTATCTGATTGGGAGCTCTGTGCTTCTAACAGTCCTATCTGGGACAATGTCTGACA	100	3e-95	99.48	HQ445495	Fungi	Basidiomycota	Agaricomycetes	Sebacinales	Sebacinaceae	Sebacina	sebacina	0	0	0	0	0	0	0	0	0	0	1	0	0	0	0	0	1	0	3	0	0	0	0
OTU_912	TAACCCCTCAAGCTCTGCTTGGTGTTGGGGCCTGCCGTCTGGCAGCCCTTAAAATCAGTGGCGGTGCCATCTGGCTCTAAGCGTAGTAATTTTTCTCGCTATAGAGTCCCGGTGGATGCTTGCCATTAACCCCCAATTTTCTAT	100	1e-68	99.31	HQ445227	Fungi	Ascomycota	Leotiomycetes	Helotiales	_	_	helotiales1	1	0	0	0	0	0	0	0	0	0	0	0	0	0	0	0	0	0	0	0	0	0	0
OTU_94	ACACCTCAACTCTCATGGTTTTTCCATGATGGGCTTGGACTTTGGGGGTCTTGCTGGCCTATGGTCAGCTCCTCTTAAATGAATCAGCTTGCCAGTGTTTGGTGGCATCACAGGTGTGATAACTATCTACGCTTGTGGTTTTCCGTCAAGTAACCTTCAGCAATGGAGGTTCGCTGGGGCTTATAAAGGCCTCTCAGGATGGCTCCTTTGAAC	100	3e-90	94.55	UDB026155	Fungi	Basidiomycota	Agaricomycetes	Thelephorales	Thelephoraceae	Tomentella	tomentella-thelephora	0	0	0	0	0	0	0	0	0	0	0	0	1	0	0	1	0	0	7	0	22	0	0
OTU_946	ACACCTCAACTCTCATGGTTCGCCATGATGAGCTTGGACTTTGGGGGTCTTGCTGGCCTACGGTCGGCTCCTCTCAAATGAATCGGCTTGCCAGTGTTTGGTAGAGTCGCAGGTGTGATAACTATCTACGCTTGTGGTTTTCCGCCAGATAACCTTCAGTGATGGAGGTTCGCTGGAGCTTATAAATGTCTCTCCCCAGTGAGGACAGCTTTTTGAAC	100	6e-108	99.08	JF748114	Fungi	Basidiomycota	Agaricomycetes	Thelephorales	Thelephoraceae	Tomentella	tomentella-thelephora	1	0	0	0	0	0	0	0	0	1	0	5	0	0	1	8	1	0	0	5	0	24	0
