# Supplementary material for: First report of the ectomycorrhizal fungal community associated with two herbaceous plants in Inner Mongolia, China
Source: PeerJ. 2023 Jul 14;11:e15626. doi: 10.7717/peerj.15626 (PMC10351511; doi:10.7717/peerj.15626)
Supplement: Supplemental Information 4 — Cp, Carex pediformis; Pd, Polygonum divaricatum [file peerj-11-15626-s004.xlsx]

## Sheet: Sheet1
Tab. 1 Relative abundance of each ectomycorrhizal(EM) fungal lineages in each herbaceous plant.
EM fungi lineages	Cp (%)	Pd (%)	Total (%)
/tomentella-thelephora	47.71	47.38	47.58
/helotiales1	31.85	33.33	32.43
/tricholoma	9.52	6.08	8.18
/inocybe	0.81	11.88	5.15
/wilcoxina	3.55	0.07	2.19
/serendipita1	1.48	-	0.9
/russula-lactarius	0.45	0.84	0.6
/suillus-rhizopogon	1.08	-	0.65
/sebacina	0.54	0.35	0.46
/pustularia	0.81	-	0.49
/cenococcum	0.54	-	0.33
/laccaria	0.36	-	0.22
/genea-humaria	0.27	0.07	0.19
/cantharellus	0.22	-	0.14
/pachyphloeus-amylascus	0.22	-	0.14
/cortinarius	0.13	-	0.08
/meliniomyces	0.13	-	0.08
/boletus	0.09	-	0.05
/hebeloma-alnicola	0.09	-	0.05
/hygrophorus	0.09	-	0.05
/amphinema-tylospora	0.04	-	0.04
Cp, Carex pediformis. Pd, Polygonum divaricatum.
