# Supplementary material for: First report of the ectomycorrhizal fungal community associated with two herbaceous plants in Inner Mongolia, China
Source: PeerJ. 2023 Jul 14;11:e15626. doi: 10.7717/peerj.15626 (PMC10351511; doi:10.7717/peerj.15626)
Supplement: Supplemental Information 7 — AN, soil available nitrogen. AP, soil available phosphorus. AK, soil available potassium. OM, soil total organic matter. TN, soil total nitrogen. TP, soil total phosphorus. TK, soil total potassium. TC, soil total carbon. [file peerj-11-15626-s007.xlsx]

## Sheet: Sheet1
Supplementary Table. Soil raw data in present study.
Site	plant	pH	AN(mg.kg-1)	AP (mg.kg-1)	AK(mg.kg-1)	OM(mg.kg-1)	TN(g.kg-1)	TP(g.kg-1)	TK(g.kg-1)	TC(%)
Jiufeng Mountain（JFS）	Carex pediformis var. pediformis	6.3	12.43	1.01	87.63	2.88	3.574	0.663	18.668	3.22
		6.52	20.31	0.8	76.95	5.59	2.692	0.335	19.719	6.722
		6.51	12.79	1.85	68.93	3.6	2.692	0.335	19.719	6.722
		7.15	30.16	2.64	110.65	3.57	2.692	0.335	19.719	6.722
		6.73	18.01	3.36	92.75	4.94	3.202	0.623	17.139	4.535
	Polygonum divaricatum L.	6.94	56.06	1.65	49.62	4.28	2.692	0.335	19.719	6.722
		6.89	11.7	0.75	115.15	3.4	3.202	0.623	17.139	4.535
Chunkun Mountain（CKS）	Polygonum divaricatum L.	6.89	74.37	1.51	27.55	6.29	3.723	0.515	14.123	4.3
		6.68	72.82	2.12	125.84	7.4	4.895	0.93	17.394	5.54
	Carex pediformis var. pediformis	6.91	150.02	3.3	123.03	6.32	3.723	0.515	14.123	4.3
