# Supplementary material for: First report of the ectomycorrhizal fungal community associated with two herbaceous plants in Inner Mongolia, China
Source: PeerJ journal article supplement (doi:10.7717/peerj.15626), 2023-07-14

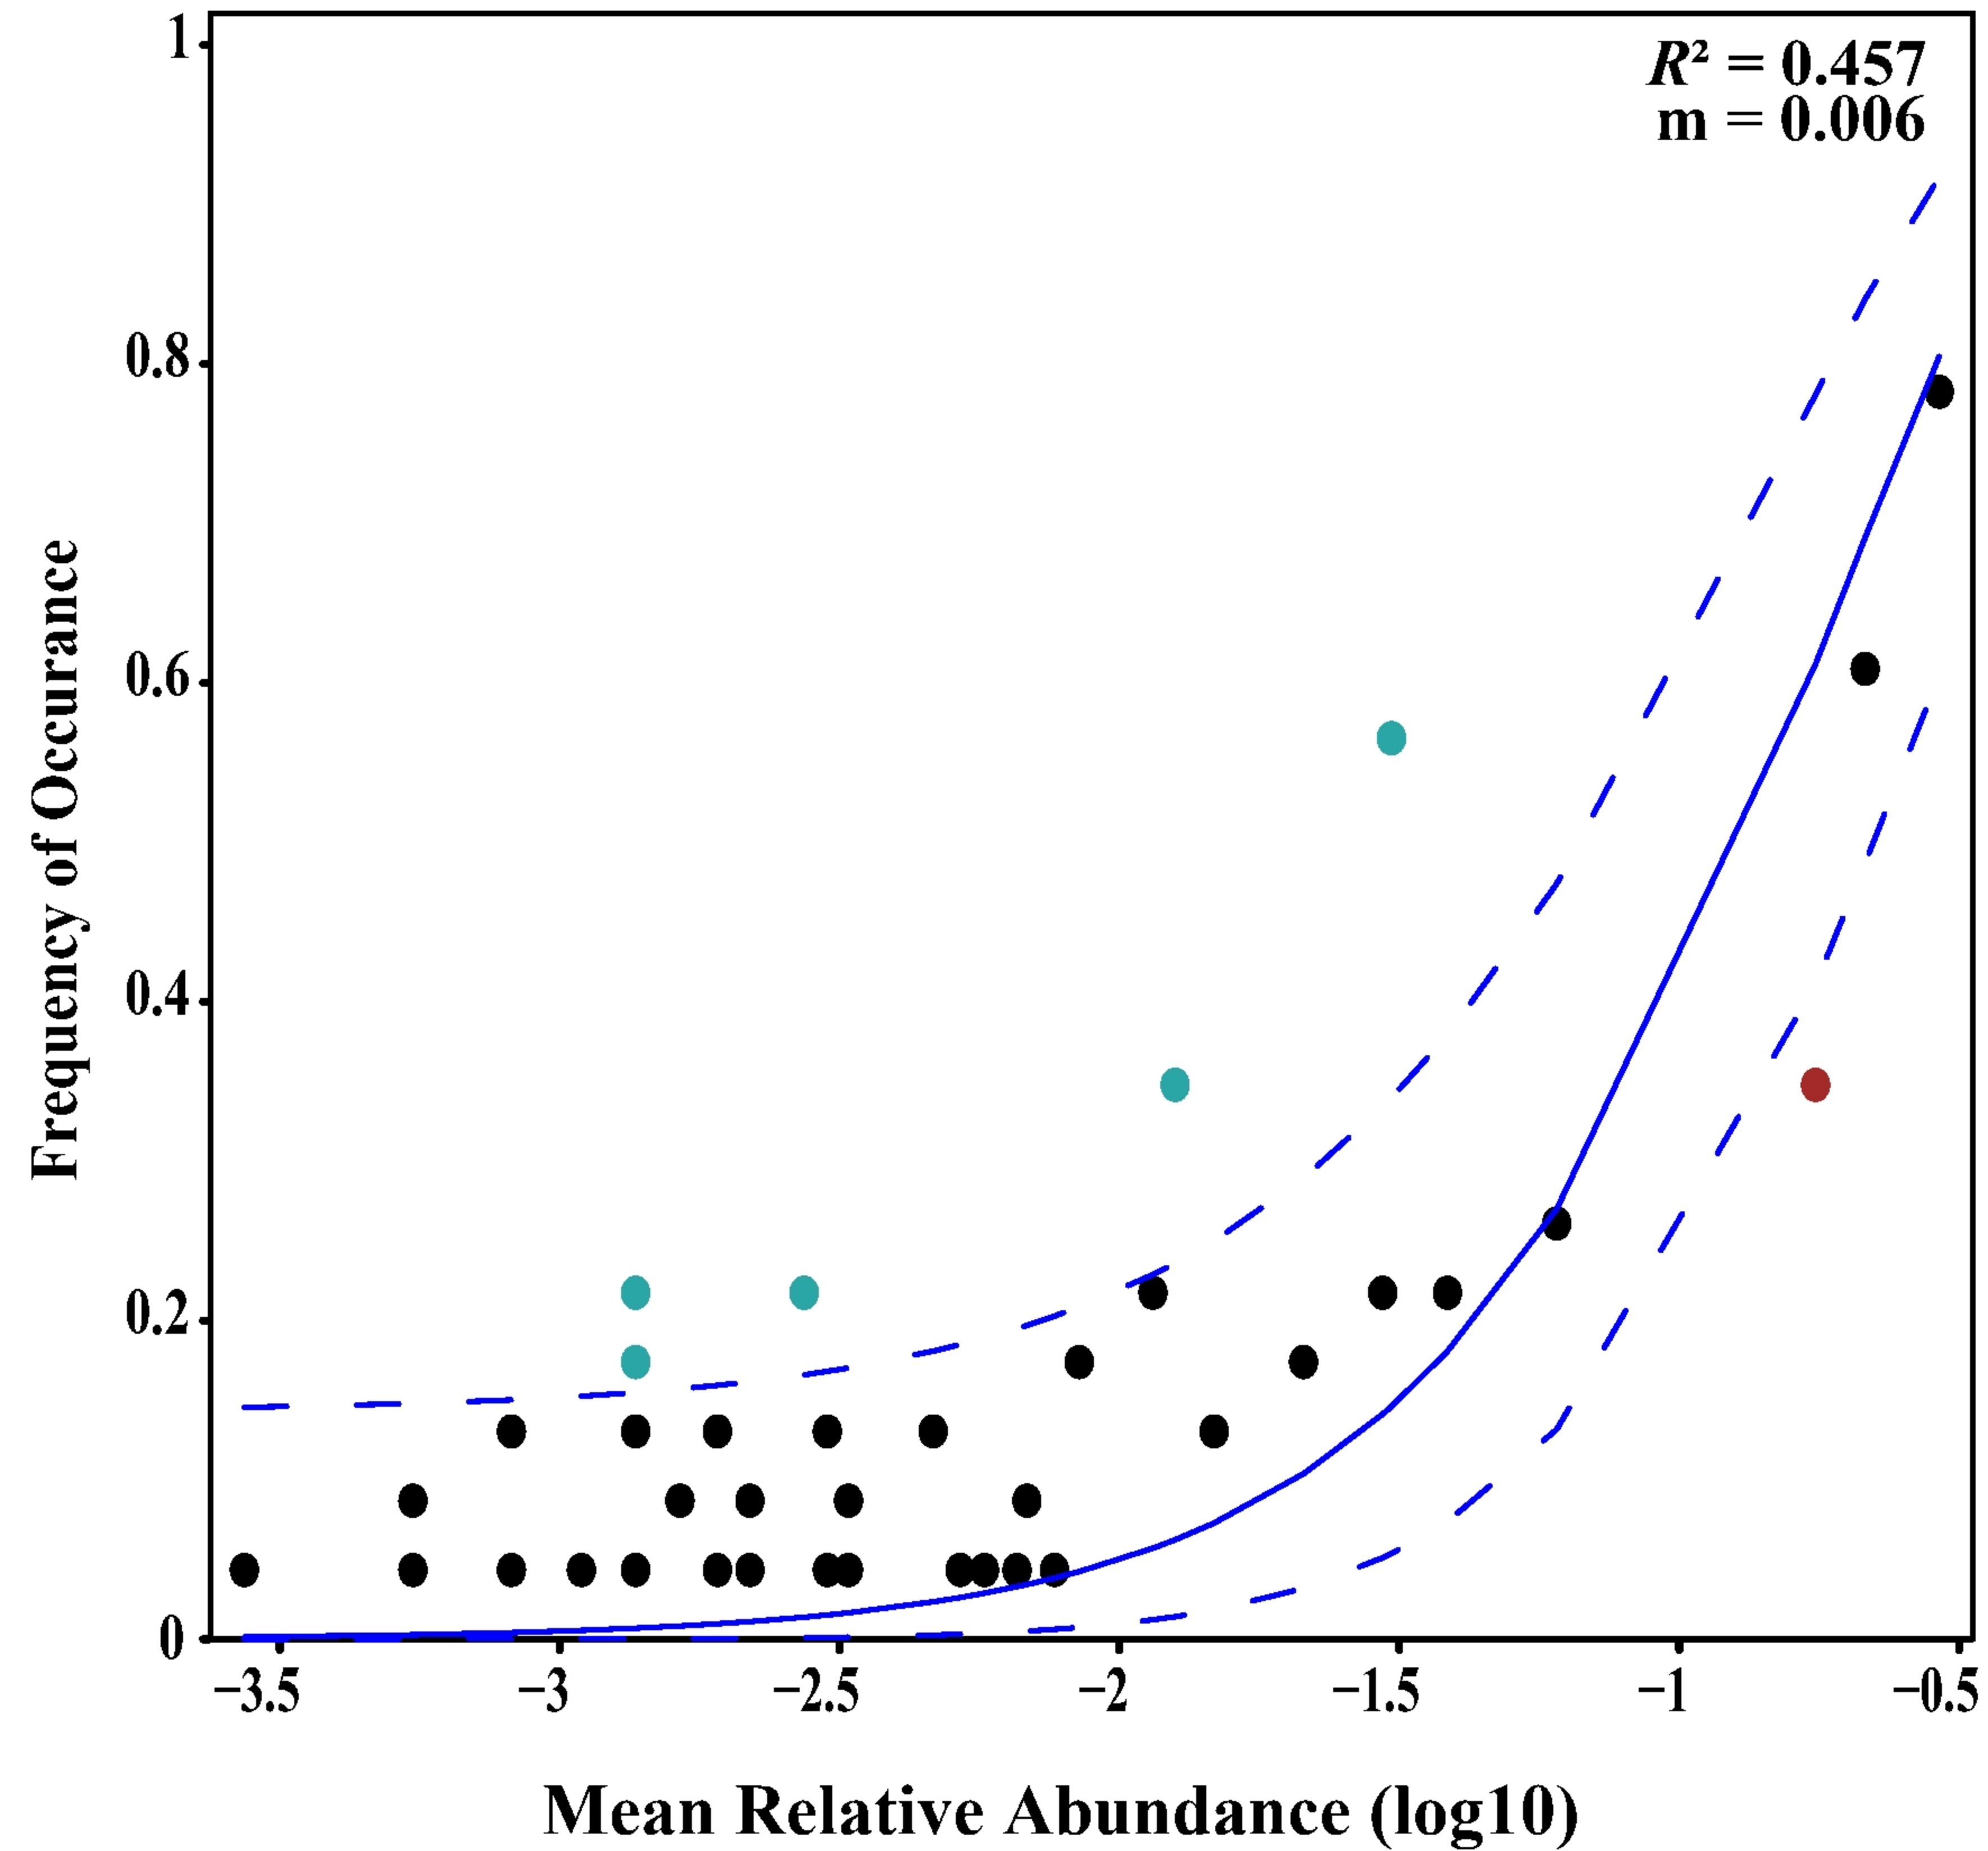

Supplement: Supplementary_figure_2.pdf [file Supplementary_figure_2.pdf]
